# Supplementary material
Source: Springer Nature journal article supplement (https://www.springermedizin.de/resource/supplementary/13098_2013_285_MOESM1_ESM.pdf/9670914)

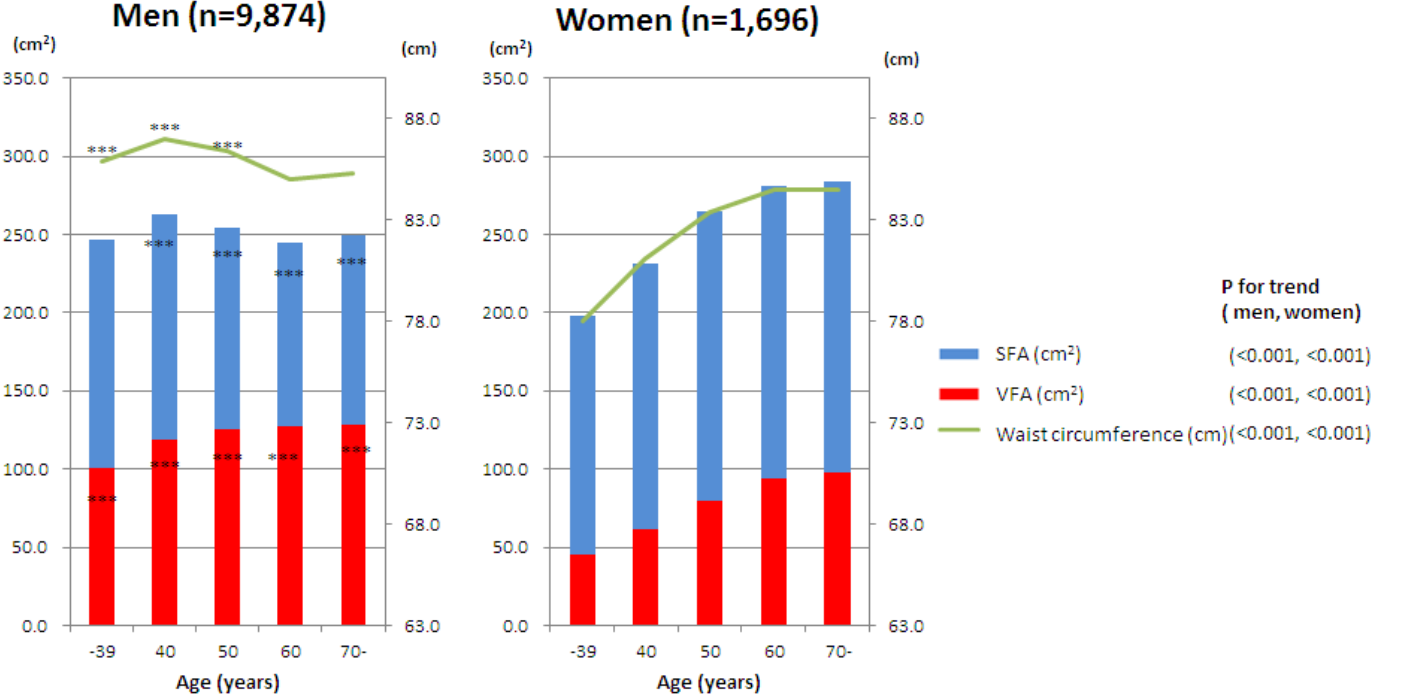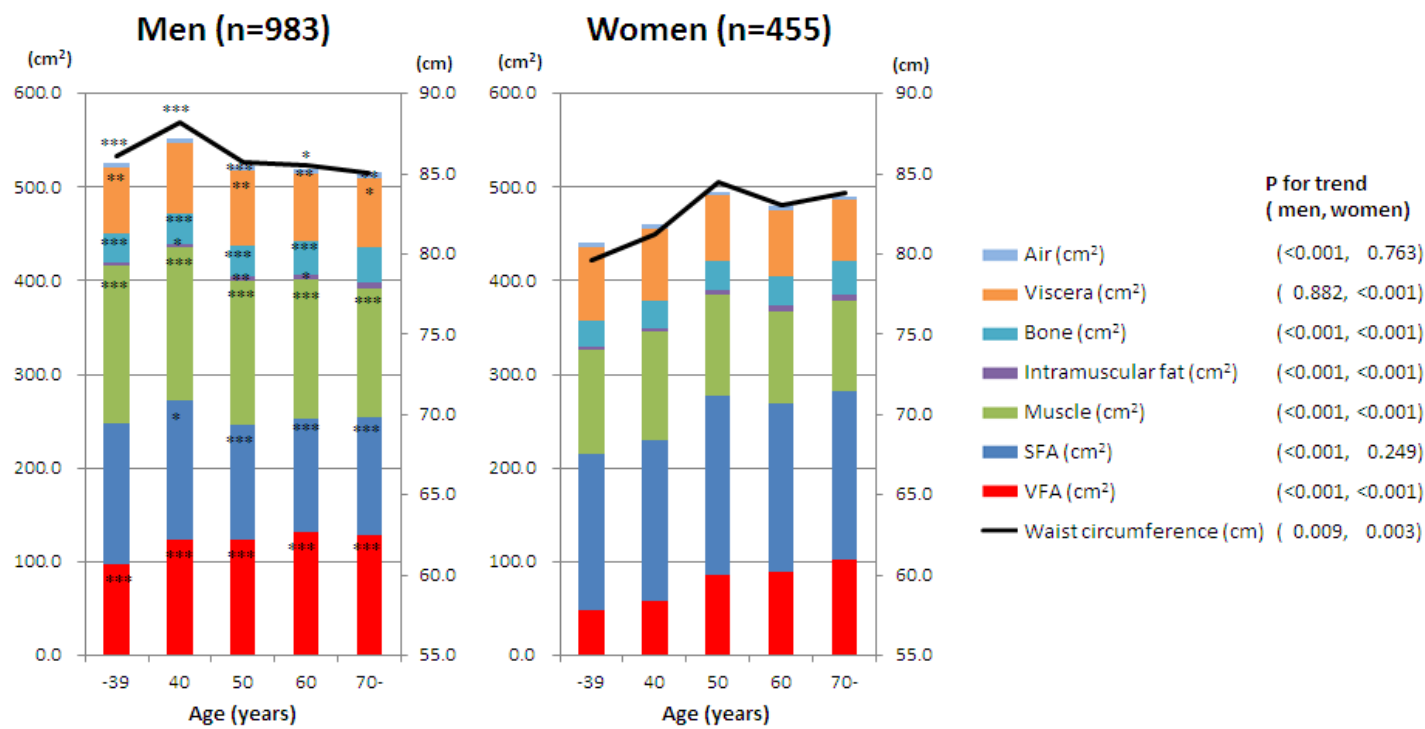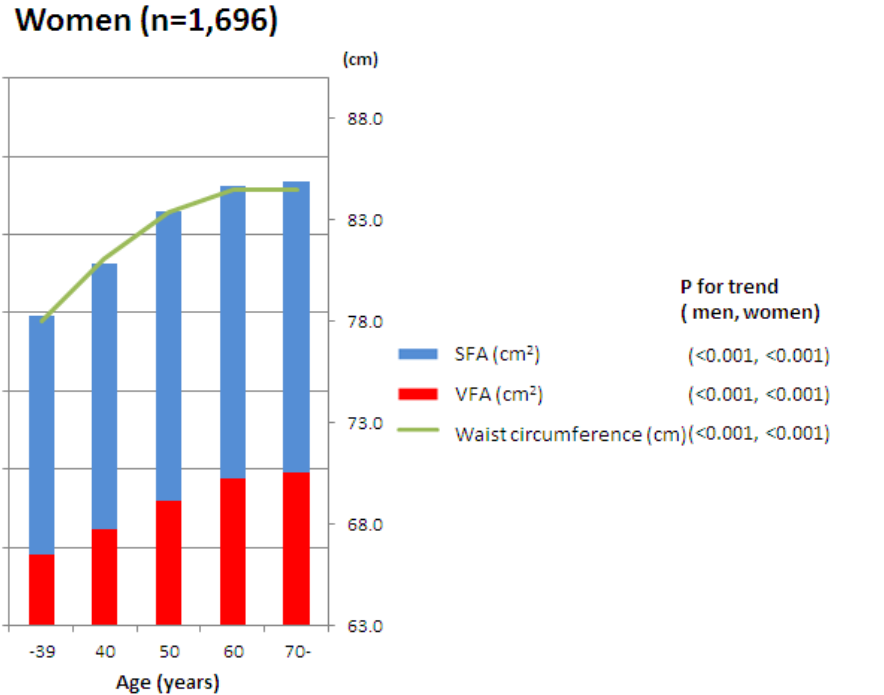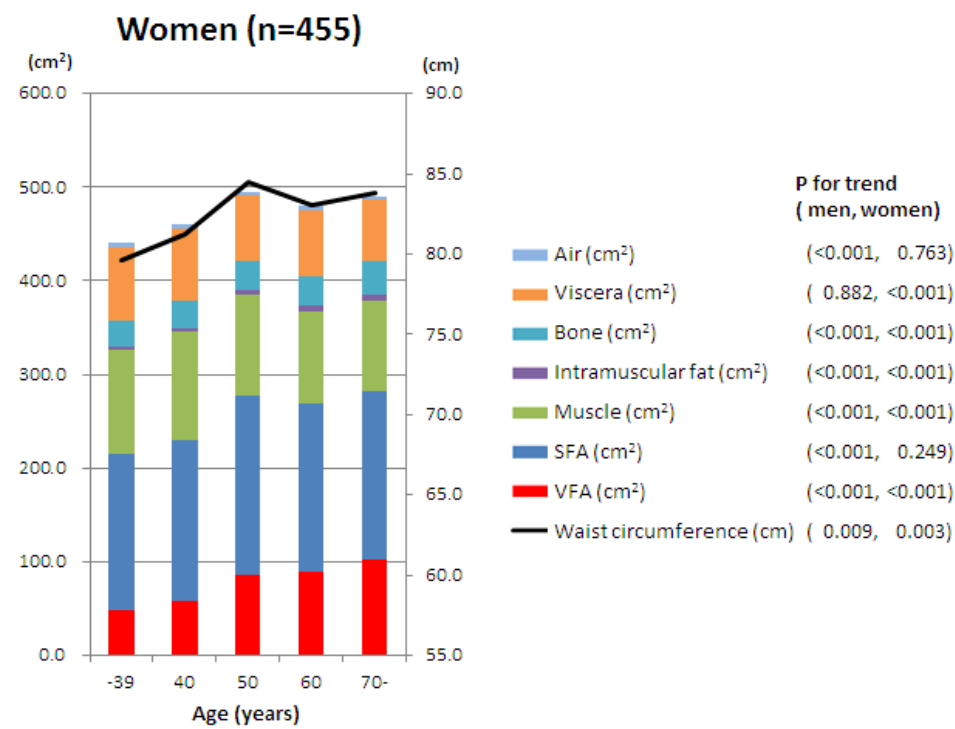

Supplement: MOESM1 [file 9670914]
